# Supplementary material
Source: ML conference proceedings conference paper supplement (https://openaccess.thecvf.com/content/cvpr_2016/html/Jug_Moral_Lineage_Tracing_2016_CVPR_paper.html)
Supplement: Supplementary file 1 [file Jug_Moral_Lineage_Tracing_2016_CVPR_supplemental.pdf]

## Moral Lineage Tracing (Supplement)

Florian Jug<sup>1,\*</sup>, Evgeny Levinkov<sup>2,\*</sup>, Corinna Blasse<sup>1</sup>, Eugene W. Myers<sup>1</sup>, Bjoern Andres<sup>2</sup>

<sup>1</sup>Max Planck Institute of Molecular Cell Biology and Genetics, Dresden

<sup>2</sup>Max Planck Institute for Informatics, Saarbrücken

### 1. Proof of Lemma 2

PROOF If Condition 1 in Def. 2 holds for a set  $C \subseteq E$ , then all inequalities (1) are satisfied by the  $x \in \{0, 1\}^E$  such that  $x^{-1}(1) = C$ . Otherwise, there would exist a  $t \in \mathbb{N}$ , a cycle  $Y$  of  $G_t$  and an  $e \in Y$  such that  $x_e = 1$  and  $\forall e' \in Y \setminus \{e\}$ :  $x_{e'} = 0$ . This implies  $|Y \cap C| = 1$ , in contradiction to the assumption that  $C \cap E_t$  is a multicut of  $G_t$ . Conversely, if all inequalities (1) are satisfied by an  $x \in \{0, 1\}^E$ , then  $C := x^{-1}(1)$  satisfies Condition 1 in Def. 2. Otherwise, there would exist a  $t \in \mathbb{N}$  for which  $C \cap E_t$  is not a multicut of  $G_t$ . Thus, there would exist a cycle  $Y$  of  $G_t$  and an  $e \in Y$  such that  $Y \cap C = \{e\}$ , by definition of a multicut. Hence, the inequality (1) for that cycle  $Y$  and that edge  $e$  of  $Y$  would be violated by  $x$ . The sufficiency of chordless cycles follows from (1) and is established, e.g., in [?].

If Condition 2 in Def. 2 holds for a set  $C \subseteq E$ , then all inequalities (2) are satisfied by the  $x \in \{0, 1\}^E$  such that  $x^{-1}(1) = C$ . Otherwise, there would exist  $t \in \mathbb{N}$ ,  $\{v, w\} \in E_{t,t+1}$  and a path  $P \in vw$ -paths( $G_t^+$ ) such that  $x_{vw} = 1$  and  $x_P = 0$ . From  $x_{vw} = 1$  follows  $\{v, w\} \in E_{t,t+1} \cap C$ . From  $x_P = 0$  follows that  $v$  and  $w$  are connected by  $P$  in  $(V_t^+, E_t^+ \cap \bar{C})$ . Both statements together contradict the assumption. Conversely, if all inequalities (2) are satisfied by an  $x \in \{0, 1\}^E$ , then  $C := x^{-1}(1)$  satisfies Condition 2 in Def. 2. Otherwise, there would exist  $t \in \mathbb{N}$ ,  $\{v, w\} \in E_{t,t+1} \cap C$  and a path  $P \in vw$ -paths( $V_t^+, E_t^+ \cap \bar{C}$ ). From this follows  $x_{vw} = 1$  and  $x_P = 0$ , in contradiction to the assumption that (2) is satisfied.

If Condition 3 in Def. 2 holds for a set  $C \subseteq E$ , then all inequalities (3) are satisfied by the  $x \in \{0, 1\}^E$  such that  $x^{-1}(1) = C$ . Otherwise, there would exist  $t \in \mathbb{N}$ ,  $v_t, w_t \in V_t$ ,  $v_{t+1}, w_{t+1} \in V_{t+1}$ , a path  $P \in v_{t+1}, w_{t+1}$ -paths( $G_{t+1}$ ), and a cut  $T \in v_t w_t$ -cuts( $G_t$ ) such that  $x_{v_t, v_{t+1}} = 0$  and  $x_{w_t, w_{t+1}} = 0$  and  $x_P = 0$  and  $x_T = 1$ .  $P$  witnesses the existence of a  $v_{t+1} w_{t+1}$ -path in  $(V, E_{t+1} \cap \bar{C})$ . The existence of  $T$  certifies the non-existence of a  $v_t w_t$ -path in  $(V, E_t \cap \bar{C})$ . Both statements together contradict the assumption. Conversely, if all inequalities (3) are satisfied by an  $x \in \{0, 1\}^E$ , then  $C := x^{-1}(1)$  satisfies Condition 3 in Def. 2. Otherwise, there would exist

ist  $t \in \mathbb{N}$ ,  $v_t, w_t \in V_t$  and  $v_{t+1}, w_{t+1} \in V_{t+1}$  such that  $\{v, w\} \in E_{t,t+1} \cap \bar{C}$  and  $\{v_{t+1}, w_{t+1}\} \in E_{t,t+1} \cap \bar{C}$  and such that there exist  $P \in v_{t+1} w_{t+1}$ -paths( $V_{t+1}, E_{t+1} \cap \bar{C}$ ) and  $T \in v_t w_t$ -cuts( $V_t, E_t \cap \bar{C}$ ). Hence,  $x_{v_t, v_{t+1}} = 0$  and  $x_{w_t, w_{t+1}} = 0$  and  $x_P = 0$  and  $x_T = 1$ , in contradiction to the assumption that (3) is satisfied.  $\square$
